# Supplementary material for: Delayed Surgery after Neoadjuvant Treatment for Rectal Cancer Does Not Lead to Impaired Quality of Life, Worry for Cancer, or Regret
Source: MDPI journal article supplement (doi:10.3390/cancers13040742), 2021-02-11
Supplement: s1 [file s1]

# Supplementary Materials: Delayed Surgery after Neoadjuvant Treatment for Rectal Cancer Does Not Lead to Impaired Quality of Life, Worry for Cancer, or Regret

**Table S1.** Definition of clinical complete response (cCR) and near cCR.

| Complete Response (cCR) |                                                 | Near cCR                                  |                                                                                                               |
|-------------------------|-------------------------------------------------|-------------------------------------------|---------------------------------------------------------------------------------------------------------------|
| DRE                     | No palpable tumor                               | Superficial soft irregular tumor palpable |                                                                                                               |
| Endoscopy               | White scar with teleangiectasia                 | ○                                         | Small persistent ulcer                                                                                        |
|                         |                                                 | ○                                         | Irregular thickening of mucosa and/or dysplasia at histology                                                  |
| MRI                     | ○ Absence of tumor at T2W-MRI                   | ○                                         | Downstaging of the tumor with or without fibrosis, but with a heterogeneous or irregular aspect on MRI and/or |
|                         | ○ Low signal at tumor location at b1000 DWI-MRI | ○                                         | Limited focal area with high signal at b1000 DWI-MRI                                                          |
|                         | ○ Absence of suspicious lymph nodes at T2W-MRI. |                                           |                                                                                                               |

**Table S2.** QLQ-C30 scores (mean + SD) for direct vs delayed surgery groups. P- values in **bold** are significant (<0.05).

|                        | Direct to Surgery |       | Delayed Surgery |       | p           |
|------------------------|-------------------|-------|-----------------|-------|-------------|
|                        | Mean              | SD    | Mean            | SD    |             |
| PF                     | 89.20             | 16.11 | 77.62           | 21.34 | <b>0.03</b> |
| RF                     | 86.67             | 22.49 | 76.19           | 29.75 | 0.33        |
| EF                     | 80.83             | 24.77 | 88.10           | 23.51 | 0.29        |
| CF                     | 81.67             | 24.11 | 89.29           | 16.80 | 0.66        |
| SF                     | 79.44             | 28.93 | 82.14           | 17.86 | 0.97        |
| Fatigue                | 20.74             | 21.19 | 26.19           | 28.11 | 0.27        |
| NV                     | 2.78              | 7.69  | 1.19            | 4.45  | 0.58        |
| Pain                   | 10.56             | 18.82 | 20.24           | 27.09 | 0.34        |
| Dyspnoea               | 5.75              | 12.81 | 11.90           | 28.06 | 0.84        |
| Insomnia               | 22.99             | 29.69 | 19.05           | 31.25 | 0.63        |
| Appetite loss          | 4.60              | 11.70 | 2.38            | 8.91  | 0.44        |
| Constipation           | 13.79             | 24.43 | 7.14            | 14.19 | 0.61        |
| Diarrhoea              | 16.09             | 26.16 | 16.67           | 28.50 | 0.89        |
| Financial difficulties | 10.00             | 19.87 | 11.90           | 24.83 | 0.78        |
| Quality of life        | 80.46             | 22.52 | 77.98           | 22.31 | 0.53        |

**Table S3.** QLQ-CR29 scores (mean + SD) for direct vs delayed surgery groups. P- values in **bold** are significant (<0.05).

|                          | Direct to surgery |       | Delayed surgery |       | p    |
|--------------------------|-------------------|-------|-----------------|-------|------|
|                          | Mean              | SD    | Mean            | SD    |      |
| Urinary frequency        | 29.17             | 29.5  | 34.85           | 30.23 | 0.97 |
| Body image               | 70.14             | 26.52 | 68.69           | 33.27 | 0.20 |
| Incontinence             | 34.37             | 29.48 | 27.27           | 15.41 | 0.50 |
| Blood and mucus in stool | 7.29              | 14.87 | 3.03            | 6.74  | 0.83 |
| Dysuria                  | 8.33              | 19.25 | 6.67            | 14.05 | 1.0  |
| Abdominal pain           | 20.83             | 26.87 | 21.21           | 22.47 | 0.82 |
| Buttock pain             | 15.56             | 30.52 | 27.27           | 35.96 | 0.07 |
| Dry mouth                | 25                | 22.77 | 18.18           | 34.52 | 0.24 |

|                      |       |       |       |       |             |
|----------------------|-------|-------|-------|-------|-------------|
| Hair loss            | 8.33  | 19.25 | 0     | 0     | 0.15        |
| Loss of taste        | 6.25  | 18.13 | 6.06  | 20.1  | 0.38        |
| Worry for the future | 37.78 | 30.52 | 24.24 | 21.56 | 0.47        |
| Worry over weight    | 22.92 | 26.44 | 24.24 | 36.79 | 0.95        |
| Embarrassment        | 37.78 | 37.52 | 21.21 | 26.97 | 0.63        |
| Stoma care problems  | 2.78  | 9.62  | 3.33  | 10.54 | 1.0         |
| Arousal men          | 20    | 29.81 | 57.14 | 16.27 | <b>0.02</b> |
| Arousal women        | 26.67 | 26.29 | 16.67 | 33.33 | 0.12        |
| Sex difficulty women | 33.33 | 25.2  | 50    | 70.71 | 0.63        |
| Sex difficulty men   | 60    | 43.46 | 66.67 | 47.14 | 0.09        |
| Bowel symptoms       | 26.04 | 25.07 | 8.33  | 16.2  | 0.07        |
| Bloating             | 25    | 25.82 | 18.18 | 22.92 | 0.59        |

**Table S4.** Non responder comparison. One patient had a multivisceral resection classified as 'other'. There are no significant differences ( $p < 0.05$ ) between groups.

|                                     | Non responder |      | Responder  |      | <i>p</i> |
|-------------------------------------|---------------|------|------------|------|----------|
|                                     | N (%)         | Mean | N (%)      | Mean |          |
| Age                                 |               | 65.8 |            | 63.0 | 0.35     |
| Sex                                 |               |      |            |      |          |
| M                                   | 23 (63.9%)    |      | 28 (54.9%) |      | 0.40     |
| F                                   | 13 (36.1%)    |      | 23 (45.1%) |      |          |
| ASAScore                            |               |      |            |      |          |
| 1                                   | 11 (30.6%)    |      | 18 (35.3%) |      | 0.59     |
| 2                                   | 24 (66.7%)    |      | 29 (56.9%) |      |          |
| 3                                   | 1 (2.8%)      |      | 4 (7.8%)   |      |          |
| Surgery                             |               |      |            |      |          |
| Direct                              | 25 (69.4%)    |      | 33 (64.7%) |      | 0.65     |
| Delayed                             | 11 (30.6%)    |      | 18 (35.3%) |      |          |
| Endoscopic distance from anal verge |               | 8    |            | 8    | 0.61     |
| cT                                  |               |      |            |      |          |
| 2                                   | 1 (2.8%)      |      | 0 (0%)     |      | 0.41     |
| 3                                   | 30 (83.3%)    |      | 48 (94.1%) |      |          |
| 4                                   | 5 (13.9%)     |      | 3 (5.9%)   |      |          |
| cN                                  |               |      |            |      |          |
| 0                                   | 3 (8.3%)      |      | 5 (9.8%)   |      | 0.71     |
| 1                                   | 13 (36.1%)    |      | 15 (29.4%) |      |          |
| 2                                   | 20 (55.6%)    |      | 31 (60.8%) |      |          |
| MRF                                 |               |      |            |      |          |
| -                                   | 9 (25.0%)     |      | 8 (15.7%)  |      | 0.28     |
| +                                   | 27 (75.0%)    |      | 43 (84.3%) |      |          |
| Time to surgery (weeks)             |               | 27.3 |            | 22.6 | 0.35     |
| Type of operation                   |               |      |            |      |          |
| APR                                 | 14 (38.9%)    |      | 20 (39.2%) |      | 0.97     |
| LAR                                 | 21 (58.3%)    |      | 31 (60.8%) |      |          |
| Other                               | 1 (2.8%)      |      | 0 (0%)     |      |          |
| Laparoscopy                         |               |      |            |      |          |
| no                                  | 7 (19.6%)     |      | 9 (17.6%)  |      | 0.84     |
| yes                                 | 29 (80.6%)    |      | 42 (82.4%) |      |          |
| Conversion                          |               |      |            |      |          |
| no                                  | 34 (94.4%)    |      | 45 (88.2%) |      | 0.40     |
| yes                                 | 2 (5.6%)      |      | 5 (9.8%)   |      |          |
| unknown                             | 0 (0.0%)      |      | 1 (2.0%)   |      |          |
| Surgical reintervention             |               |      |            |      | 0.06     |
| no                                  |               |      |            |      |          |

|                    |            |            |           |
|--------------------|------------|------------|-----------|
| yes                | 28 (77.7%) | 49 (95.7%) |           |
| unknown            | 6 (16.7%)  | 2 (4.3%)   |           |
|                    | 2 (5.6%)   |            |           |
| Readmission        |            |            |           |
| no                 | 25 (75.8%) | 43 (84.3%) | 0.10      |
| yes                | 8 (24.2%)  | 8 (15.7%)  |           |
| Distant relapse    |            |            |           |
| no                 | 31 (86.1%) | 41 (82.0%) | 0.77      |
| yes                | 5 (13.9%)  | 9 (18.0%)  |           |
| Follow up (months) |            | 27.6       | 31.1 0.38 |
